# Supplementary material for: Gene-Editing and RNA Interference in Treating Hepatitis B: A Review
Source: MDPI journal article supplement (doi:10.3390/v15122395), 2023-12-08
Supplement: s1 [file s1]

**Supplementary Tables (1-3) for  
“Biotechnological Approach in Treating Hepatitis B: A Review”**

by Nadiia Kasianchuk, Krystyna Dobrowolska, Sofiia Harkava, Andreea Bretcan, Dorota Zarębska-Michaluk, Jerzy Jaroszewicz, Robert Flisiak, and Piotr Rzymiski

**Supplementary Table S1.** The summary of studies exploring the use of Zinc Finger Proteins (ZFP) including Zinc Finger Nucleases (ZFN) and Zinc Finger Antiviral Proteins (ZAP) in the treatment of HBV infection.

| Year | Experimental model                                                    | Targets                                                                                                                 | Delivery method                                                                                                                                                                                                                                                                                                                                                                                    | Effectiveness                                                                                                                                                                                                                                                                                                                                                                                                                                                                                                                              | Off-targets and other limitations                                        | Reference |
|------|-----------------------------------------------------------------------|-------------------------------------------------------------------------------------------------------------------------|----------------------------------------------------------------------------------------------------------------------------------------------------------------------------------------------------------------------------------------------------------------------------------------------------------------------------------------------------------------------------------------------------|--------------------------------------------------------------------------------------------------------------------------------------------------------------------------------------------------------------------------------------------------------------------------------------------------------------------------------------------------------------------------------------------------------------------------------------------------------------------------------------------------------------------------------------------|--------------------------------------------------------------------------|-----------|
| 2008 | <i>In vitro</i> : Longhorn male hepatoma cells infected with duck HBV | Enhancer region                                                                                                         | ZFPs were designed with flanking XhoI and SpeI restriction endonuclease sites, and zinc fingers were linked in tandem by the canonical TGEKP linker.<br>Cells were co-transfected with pDHBV1.3 and pcDNA3.1(+) or pcDNA3.1(+)-ZFPa, -ZFPb, or -ZFP1                                                                                                                                               | 1) ZFPs significantly reduced viral pregenomic RNA production (by 32-42%).<br>2) ZFPs caused a significant reduction in the expression of viral core and surface proteins and the production of infectious viral particles.                                                                                                                                                                                                                                                                                                                | - Off-targets not detected<br>- No effect on cellular protein synthesis  | [1]       |
| 2010 | <i>In vitro</i> : Huh7, HEK-293                                       | Upstream of the common polyadenylation site of the four overlapping viral mRNAs near the N-terminus of the core protein | Vector (cytomegalovirus and T7 promoters). ZNFs were fused to the codon-optimized version of FokI.                                                                                                                                                                                                                                                                                                 | 1) Transfection efficiency ranged from 35-46%.<br>2) 8/18 of ZFNs cleaved their homodimeric targets.<br>3) The ZFNs 6L and 6R together cleaved their heterodimeric target, but not when used individually.<br>4) A 29% reduction in the levels of pregenomic RNA was observed.<br>5) Frameshift mutations were found in 13/16 sequences, potentially leading to premature stop codons and significant truncations of the essential viral protein.<br>6) A significant portion of the cleaved target DNA remained linear or was misrepaired | - Off-targets not detected<br>- Cytotoxicity                             | [2]       |
| 2013 | <i>In vitro</i> : HepG2, Huh7, HEK-293T, HepDES19                     | Within the 100-nucleotide-long terminal redundant region in the viral RNA genome                                        | Plasmids<br><u>rN-ZAP</u> : Expressed the N-terminal 254 a.a. zinc-finger motif domain of rat ZAP<br><u>hZAP-L</u> : Full-length human ZAP isomer<br><u>hZAP-S</u> : Full-length human ZAP isomer<br><u>hN-ZAP</u> : Expressed the N-terminal 254 a.a. of human ZAP, cloned into pcDNA4<br><u>Mutant hZAP-S</u> : Contained disrupted individual or all four putative zinc finger motifs in hZAP-S | 1) ZAP overexpression significantly reduced HBV DNA by decreasing viral pgRNA levels.<br>2) Liver-specific host factors were not essential for ZAP's antiviral function.<br>3) ZAP primarily accelerated HBV RNA decay posttranscriptionally in the nucleus,<br>4) ZAP's antiviral activity against HBV required its zinc finger motifs for binding to HBV RNA.<br>5) ZAP worked alongside other interferon-stimulated genes for maximal antiviral protection.                                                                             | - Off targets not reported<br>- Potential effect on host gene expression | [3]       |

|      |                                                                               |                                                            |                                                                                                                                                                                                                                                                                                                                     |                                                                                                                                                                                                                                                                                                                                                                                                                                                                                                                                                                                                                                                        |                                                                                                                                   |     |
|------|-------------------------------------------------------------------------------|------------------------------------------------------------|-------------------------------------------------------------------------------------------------------------------------------------------------------------------------------------------------------------------------------------------------------------------------------------------------------------------------------------|--------------------------------------------------------------------------------------------------------------------------------------------------------------------------------------------------------------------------------------------------------------------------------------------------------------------------------------------------------------------------------------------------------------------------------------------------------------------------------------------------------------------------------------------------------------------------------------------------------------------------------------------------------|-----------------------------------------------------------------------------------------------------------------------------------|-----|
|      |                                                                               |                                                            | <u>DN-IRF3</u> : Dominant-negative IRF3<br><u>DN-IkBα</u> : Dominant negative IκB-alpha                                                                                                                                                                                                                                             |                                                                                                                                                                                                                                                                                                                                                                                                                                                                                                                                                                                                                                                        |                                                                                                                                   |     |
| 2014 | <i>In vitro</i><br>HEK-293T HepAD38                                           | ZFN1: ORF P/X<br>ZFN2: ORF P/C<br>ZFN3: ORF P              | Plasmid transfection<br>or self-complementary adeno-associated<br>virus (scAAV)                                                                                                                                                                                                                                                     | 1) Plasmid transfection: ZFN2: the highest target<br>mutagenesis rate (34%). ZFN3: highest (sustained)<br>HBV replication suppression rate<br>2) scAAV: ZFN2: the highest target mutation rate<br>(43%). ZFN3: highest (sustained) HBV replication<br>suppression rate.                                                                                                                                                                                                                                                                                                                                                                                | - Minimal off-<br>target<br>mutagenesis<br>- Off-target in<br>other genome<br>regions not<br>analyzed<br>- Cytotoxicity<br>(ZFN2) | [4] |
| 2015 | <i>In vivo</i> : transgenic<br>mice                                           | Terminal redundant region (nt<br>1820–1918) of HBV pgRNA.. | <u>ZAP transgenic mouse</u> : microinjection of<br>pEFmZAPmyc into the fertilized egg<br>nucleus of ICR mouse<br><br>ZAP transgenic mouse transfected pHBV4.1<br>was termed the ZAP-ICR/HBV mouse as<br>the experimental group, and ICR mouse<br>transfected pHBV4.1 was termed the<br>ICR/HBV mouse as the control group.          | 1) ZAP transgenic mice had HBV 3.5 kb and 2.4/2.1 kb<br>mRNA levels decreased by 8 and 21%, respectively.<br>2) HBV RC or HBV SS DNA levels in ZAP transgenic<br>mice decreased significantly, with an 82% decrease in<br>HBV DNA replicative intermediates.<br>3) ZAP transgenic mice had a few HBsAg-positive and<br>HBcAg-positive cells.<br>4) ZAP-mediated HBV RNA reduction was due to<br>transcriptional inhibition but possibly due to<br>accelerating HBV RNA decay.<br>5) ZAP decreased HBV RNA, HBV DNA replication<br>intermediates, viral protein expression                                                                              | Off-targets not<br>reported                                                                                                       | [5] |
| 2018 | <i>In vitro</i> : HepG2,<br>HepG2.2.15<br><i>In vivo</i> : transgenic<br>mice | HBV DNA EnhI                                               | The N-terminal ZF domain was fused to<br>KRAB repression domains from the human<br>ZFP 10 gene.<br><br><u>HepG2.2.15</u> : transfection with pcDNA3.1-<br>ATF, pcDNA-nls-KRAB-flag, pcDNA-nls-<br>ZFP-flag, pcDNA-ATF flag<br><u>Mice</u> : injection of pcDNA 3.1(+), pcDNA-<br>nls-KRAB-flag, pcDNA-ATF or pcDNA-nls-<br>ZFP-flag | 1) HBV mRNA levels were reduced by 63% with<br>pcDNA3.1-ATF and 49% with pcDNA3.1(+)-nls-ZFP-<br>flag, while pcDNA3.1(+)-nls-KRAB-flag had a minor<br>effect.<br>2) pcDNA3.1-ATF inhibited HBeAg secretion <i>in vitro</i><br>and <i>in vivo</i> but did not affect HBsAg<br>3) Both pcDNA3.1-ATF and pcDNA3.1(+)-nls-ZFP-<br>flag suppressed HBV core and x protein <i>in vitro</i> .<br>4) ATF significantly inhibited HBV replication <i>in vitro</i><br>and <i>in vivo</i> .<br>5) HBV EnhI-specific ATF significantly inhibited HBV<br>transcription.<br>6) pcDNA3.1-ATF reduced HBV replication by 68%<br>compared to pcDNA3.1(+)-nls-KRAB-Flag. | Off-targets not<br>reported<br>- No cytotoxicity                                                                                  | [6] |
| 2019 | <i>In vitro</i> : HepG2                                                       | Unspecified                                                | Cotransfection with a replication-competent<br>HBV DNA plasmid (pHBV1.3x) and<br>plasmids expressing individual ZAP<br>isoforms differing in length                                                                                                                                                                                 | 1) ZAPs inhibited HBV by accelerating the decay of<br>HBV pregenomic RNA.<br>2) All ZAPs significantly inhibited the production of<br>HBeAg and HBsAg.<br>3) Longer ZAP isoforms were more effective                                                                                                                                                                                                                                                                                                                                                                                                                                                   | - Off-targets not<br>reported<br>- Cytotoxicity not<br>reported                                                                   | [7] |

**Supplementary Table S2.** The summary of studies exploring the use of transcription activator-like effector nucleases (TALEN) in the treatment of HBV infection.

| Year | Experimental model                                                               | Targets                                                           | Delivery method                                                                                                                                                                                                                            | Effectiveness                                                                                                                                                                                                                                                                                                                                                                                                                                                                                                                                        | Off-targets and other limitations                                                                            | Reference |
|------|----------------------------------------------------------------------------------|-------------------------------------------------------------------|--------------------------------------------------------------------------------------------------------------------------------------------------------------------------------------------------------------------------------------------|------------------------------------------------------------------------------------------------------------------------------------------------------------------------------------------------------------------------------------------------------------------------------------------------------------------------------------------------------------------------------------------------------------------------------------------------------------------------------------------------------------------------------------------------------|--------------------------------------------------------------------------------------------------------------|-----------|
| 2013 | <i>In vitro</i> : Huh7, HepG2.2.15<br><i>In vivo</i> : murine hydrodynamic model | S/P ORF C/P ORF P ORF S/pol, C/pol and pol ORFs of the HBV genome | Cotransfection with HBV replication-competent plasmid and plasmids expressing TALEN<br><i>In vivo</i> : bolus injection with HBV target DNA (pCH-9/3091) and of mock pUC118 or 16 µg of pairs of left and right TALEN-expressing plasmids. | 1) <i>In vitro</i> effects:<br>- S TALEN: HBsAg reduction (by 70% under hypothermic conditions).<br>- C TALEN: HBcAg reduction.<br>- P1 TALEN: HBsAg reduction.<br>- P2 TALEN: No significant HBsAg reduction.<br>2) <i>In vivo</i> effects:<br>- S TALEN: HBsAg knockdown in serum, viral particle equivalents reduction (~70%), targeted disruption of HBV sequences in the liver (58-87%).<br>- C TALEN: Viral particle equivalents reduction (~70%), HBcAg decreased in hepatocytes, targeted disruption of HBV sequences in the liver (58-87%). | - Potential off-target sites identified for each TALEN at distant locations.<br>- No <i>in vivo</i> toxicity | [8]       |
| 2014 | <i>In vitro</i> :: Huh7<br><i>In vivo</i> : C3H/HeN mice                         | L1/R1: ORF P<br>L2/R2: C ORF L3/R3: C ORF                         | Plasmid transfection using FuGene-HD                                                                                                                                                                                                       | 1) <i>In vitro</i> effects:<br>- TALENs L1/R1 reduced HBeAg and HBsAg production, decreased levels of pgRNA (20–50%) and cccDNA (10–20%).<br>- TALENs L2/R2 reduced in HBeAg, HBsAg, HBcAg expression, decreased levels of pgRNA (20–50%), a drastic decrease in cccDNA levels (twofold)<br>- TALENs L3/R3 did not show a significant decrease in HBeAg and HBsAg production.<br>2) <i>In vivo</i> effects:<br>- TALENs L2/R2 reduced serum HBeAg, HBsAg, HBV DNA, liver HBV pgRNA, and liver core proteins.                                         | - Potential off-target sites ruled out<br>- No <i>in vitro</i> and <i>in vivo</i> cytotoxicity               | [9]       |
| 2016 | <i>In vitro</i> :: Huh7 and HepG2.2.15                                           | Core (C-TALEN) and surface (C-TALEN) open reading frames of HBV   | Plasmid transfection using polyethylenimine                                                                                                                                                                                                | 1) S-TALENs: a significant decrease in HBsAg secretion (when combined with pri-miR-31/5/8/9)<br>2) C-TALENs: limited impact (alone); increased inhibition of HBsAg when combined with pri-miR elements or artificial RNA interference.<br>3) Donor sequences with shorter flanking arms enhanced antiviral efficiency in transfected Huh7 cells.                                                                                                                                                                                                     | - Not reported                                                                                               | [10]      |
| 2021 | <i>In vitro</i> :: Huh7, HEK293 and HepG2.2.15                                   | ORF C<br>ORF S                                                    | Plasmid transfection using lipofectamine 3000                                                                                                                                                                                              | 1) <i>In vitro</i> effects:<br>- All TALENs exhibited site-specific targeted mutagenesis with no statistically significant difference in cleavage efficacy when using 2nd or 3rd generation.                                                                                                                                                                                                                                                                                                                                                         | 2nd-gen TALENs: Off-target mutations in                                                                      | [11]      |

|  |                                    |  |  |                                                                                                                                                                                                                                                                                                                                                                                                                                                                                                                                                                                                                                                                                                                                                                                                                                                                                                                                                                                                                               |                                                      |  |
|--|------------------------------------|--|--|-------------------------------------------------------------------------------------------------------------------------------------------------------------------------------------------------------------------------------------------------------------------------------------------------------------------------------------------------------------------------------------------------------------------------------------------------------------------------------------------------------------------------------------------------------------------------------------------------------------------------------------------------------------------------------------------------------------------------------------------------------------------------------------------------------------------------------------------------------------------------------------------------------------------------------------------------------------------------------------------------------------------------------|------------------------------------------------------|--|
|  | <i>In vitro</i> : female NMRI mice |  |  | <ul style="list-style-type: none"> <li>- TALENs S: All generations decreased HBsAg levels</li> <li>- TALENs C: 1st generation did not affect HBsAg expression; 2nd generation considerably reduced HBsAg levels (50%), 3rd generation (Sharkley): did not affect HBsAg expression; significant inhibition of HBV, but lower than in 1 gen</li> </ul> <p>TALENs</p> <p>2) <i>In vivo</i> effects:</p> <ul style="list-style-type: none"> <li>- All TALENs, whether targeting the core or the surface ORF, affected suppression of circulating VPEs</li> <li>- TALENs S: 1st generation decreased circulating VPEs; 2nd generation silenced HBsAg (&gt;90%), decreased in circulating VPEs (80-90%); 3rd generation (Sharkley) silenced HBsAg levels (40–60%), decreased circulating VPEs (80-90%)</li> <li>- TALENs C: 1st generation decreased HBsAg and circulating VPEs; 2nd generation decreased HBsAg and circulating VPEs (80-90%); 3rd generation (Sharkley): decreased HBsAg and circulating VPEs (80-90%).</li> </ul> | murine Pah gene. No hepatotoxicity observed in mice. |  |
|--|------------------------------------|--|--|-------------------------------------------------------------------------------------------------------------------------------------------------------------------------------------------------------------------------------------------------------------------------------------------------------------------------------------------------------------------------------------------------------------------------------------------------------------------------------------------------------------------------------------------------------------------------------------------------------------------------------------------------------------------------------------------------------------------------------------------------------------------------------------------------------------------------------------------------------------------------------------------------------------------------------------------------------------------------------------------------------------------------------|------------------------------------------------------|--|

**Supplementary Table S3.** The summary of studies exploring the use of clustered regularly interspaced palindromic repeat-Cas system (CRISPR/Cas) in the treatment of HBV infection.

| Year | Experimental model                                                                 | Targets                                     | Delivery method                                                                           | Effectiveness                                                                                                                                                                                                                                                                                                                                                                                                                                                                                                                                                                                                                                                                                                                                                         | Off-targets and other limitations                                              | Reference |
|------|------------------------------------------------------------------------------------|---------------------------------------------|-------------------------------------------------------------------------------------------|-----------------------------------------------------------------------------------------------------------------------------------------------------------------------------------------------------------------------------------------------------------------------------------------------------------------------------------------------------------------------------------------------------------------------------------------------------------------------------------------------------------------------------------------------------------------------------------------------------------------------------------------------------------------------------------------------------------------------------------------------------------------------|--------------------------------------------------------------------------------|-----------|
| 2014 | <i>In vitro</i> :: Huh7<br><i>In vivo</i> : C57BL/6 mouse model                    | 8 gRNAs S1, PS1, PS2, PS3, P1, XCp, eE, PCE | Lipid nanoparticle (Lipofectamine 2000, Lipofectamine 3000)<br><br>Hydrodynamic injection | 1) <i>In vitro</i> effects:<br>- P1 gRNA: significant suppression of HBV protein (70%); with Cas9-expression cassette - 96% suppression of intracellular surface proteins;<br>- S1 gRNA: suppression of HBV protein (40%); with Cas9-expression cassette - 90% suppression of intracellular surface proteins;<br>- XCp gRNA: suppression of HBV protein (30%); with Cas9-expression cassette - 82% suppression of intracellular surface proteins;<br>- PS2 gRNA: suppression of HBV protein (20%); with Cas9-expression cassette -77% suppression of intracellular surface proteins<br>2) <i>In vivo</i> effects:<br>- P1 gRNA: significant serum HBsAg reduction; 5% intrahepatic disruption XCp gRNA: significant serum HBsAg reduction; 4% intrahepatic disruption | - Off-targets not reported<br>- No <i>in vitro</i> and <i>in vivo</i> toxicity | [12]      |
| 2015 | <i>In vitro</i> :: HCC HepG2.2.15, HepG2-H1.3                                      | S and X ORFs                                | Lipid Nanoparticle (Lipofectamine 2000)<br><br>Lentiviral Vector                          | 1) Inhibition of HBV particle release<br>2) Impaired HBsAg release: Likely targeted viral cccDNA in <i>de novo</i> infections.<br>3) HBV Genome Editing: 44% to 89% of sequences exhibited indel modifications.                                                                                                                                                                                                                                                                                                                                                                                                                                                                                                                                                       | - Off-target not expected                                                      | [13]      |
| 2015 | <i>In vitro</i> :: HepG2, HepG2.2.15, 293T cells<br><br><i>In vitro</i> : NRG mice | S, P, C, X ORFs of HBV genome               | Lentivirus vector<br><br>Lipid Nanoparticle (TransIT-2020)                                | 1) <i>In vitro</i> effects:<br>- sgRNAs 17 and 21 (sg17 and sg21) decreased HBV pgRNA levels and HBsAg production.<br>- Combination of sg17 and sg21 showed stronger reductions in HBsAg and HBV 3.5kb RNA compared to the single guide RNAs.<br>- In HepG2.2.15, Cas9/sgRNAs induced significant suppression of HBV DNA release (77-95% decrease across different sgRNAs), HBeAg secretion, viral mRNA production, and cccDNA levels.<br>2) <i>In vivo</i> effects:                                                                                                                                                                                                                                                                                                  | - Off-target not detected<br>- Toxicity not reported                           | [14]      |

|      |                                                                                            |                                                                                                            |                                                                                                                                      |                                                                                                                                                                                                                                                                                                                                                                                                                                                                                                                                                                                                                               |                                                                                      |      |
|------|--------------------------------------------------------------------------------------------|------------------------------------------------------------------------------------------------------------|--------------------------------------------------------------------------------------------------------------------------------------|-------------------------------------------------------------------------------------------------------------------------------------------------------------------------------------------------------------------------------------------------------------------------------------------------------------------------------------------------------------------------------------------------------------------------------------------------------------------------------------------------------------------------------------------------------------------------------------------------------------------------------|--------------------------------------------------------------------------------------|------|
|      |                                                                                            |                                                                                                            |                                                                                                                                      | - Cas9 and sg21 showed a progressive suppression of HBV expression in mice, with a 4-fold decrease in viremia at day 4 post-injection.                                                                                                                                                                                                                                                                                                                                                                                                                                                                                        |                                                                                      |      |
| 2016 | <i>In vitro</i> :: Huh7, HepG2<br><br><i>In vitro</i> : M-TgHBV mouse model                | ORF S<br>ORF X<br><br>Homologous sequences from genotype A to H of HBV.                                    | Lipid nanoparticle (Lipofectamine 3000)<br><br>Hydrodynamic injection                                                                | 1) <i>In vitro</i> effects:<br>- pCas9-2 (ORF X): Significant reduction in HBcAg (66%), HBsAg (50%), HBeAg (48%), and cccDNA.<br>- pCas9-1 (ORF S): Reduction in HBcAg (45%), HBsAg (50%), HBeAg (20%) secretion<br>2) <i>In vivo</i> effects:<br>- pCas9-2: Significant decrease in liver HBcAg and serum HBsAg levels 10 days post-injection.<br>- pCas9-1: Decrease in serum HBsAg.                                                                                                                                                                                                                                        | - Off-target not reported<br>- No toxicity                                           | [15] |
| 2017 | <i>In vitro</i> :: HepG2.A64                                                               | ORF S                                                                                                      | Lipid Nanoparticle (Lipofectamine LTX)                                                                                               | 1) gRNA-91: HBeAg reduction (83.13%); HBsAg reduction (87.38%); HBV DNA reduction (91.72%)<br>2) gRNA-69: HBeAg reduction (80.53%); HBsAg reduction (86.49%); the most significant DSBs of the integrated HBV genome; HBV DNA reduction (89.21%)<br>3) gRNA-62: HBeAg reduction (70.71%); HBsAg reduction (80.07%); HBV DNA reduction (80.30%)<br>4) gRNA-60: HBeAg reduction (76.50%); HBsAg reduction (82.55%); HBV DNA reduction (86.95%)<br>5) gRNA-69-7: HBV DNA reduced to 420 ± 278 IU/mL; HBV cccDNA undetectable (<500 copies/10 <sup>6</sup> cells); no detectable HBV cccDNA, HBV DNA, HBsAg, HBeAg for 10 months. | No off-target observed                                                               | [16] |
| 2020 | <i>In vitro</i> :: HEK293, Huh7<br><br><i>In vitro</i> : liver-humanized chimeric FRG mice | containing tandem copies of three HBV-specific sgRNA target sites (C1-C3-C6 and C7-C14-C16)                | Lipid Nanoparticle (Lipofectamine 3000)<br><br>Cationic Polymer (Polyethylenimine)<br><br>Adeno-Associated Virus Vector (AAV-SaCas9) | 1) Higher survival rate of human hepatocytes in AAV-SaCas9 treated mice compared to controls.<br>2) Observed HBV target site mutations in the liver of treated mice.<br>3) No significant reduction in serum HBV DNA post-treatment<br>4) Levels of cccDNA reduced in treated mice, although not statistically significant.<br>5) Mice with higher SaCas9 transfer into HBV+ cells showed increased gene editing.                                                                                                                                                                                                             | - No off-target observed - AAV-SaCas9 therapy well-tolerated with no adverse effects | [17] |
| 2020 | <i>In vitro</i> :: HEK293T, HepG2.2.15, HepAD38, HepG2-NTCP-C4, Huh7                       | 23 candidate target sequences, including 3 in the core, 9 in polymerase, 9 in the surface, and 2 in X ORFs | Lentiviral Vector<br><br>Lipid Nanoparticle (Lipofectamine 3000)                                                                     | 1) 14/23 gRNAs showed base-editing efficiency ≥50% for polymerase and surface ORFs.<br>2) gRNAs + BE4: Substantial HBsAg suppression in HepG2.2.15 cells.<br>3) Polymerase-targeting gRNAs: HBV DNA levels decreased by >60%.                                                                                                                                                                                                                                                                                                                                                                                                 | - Minimal off-target mutations from base editing were. - On-target                   | [18] |

|      |                                                                      |                            |                                                                                                                                                       |                                                                                                                                                                                                                                                                                                                                                                                                                                                                                                                                                                                                                                                                                                                                                                                                                                                                     |                                                                                                                   |      |
|------|----------------------------------------------------------------------|----------------------------|-------------------------------------------------------------------------------------------------------------------------------------------------------|---------------------------------------------------------------------------------------------------------------------------------------------------------------------------------------------------------------------------------------------------------------------------------------------------------------------------------------------------------------------------------------------------------------------------------------------------------------------------------------------------------------------------------------------------------------------------------------------------------------------------------------------------------------------------------------------------------------------------------------------------------------------------------------------------------------------------------------------------------------------|-------------------------------------------------------------------------------------------------------------------|------|
|      |                                                                      |                            |                                                                                                                                                       | <p>4) gRNAs like gP8 and gP9 led to significant HBsAg reduction.</p> <p>5) gS3, gS7, gS8 targeting surface ORFs: significant decrease in HBV DNA levels</p>                                                                                                                                                                                                                                                                                                                                                                                                                                                                                                                                                                                                                                                                                                         | <p>indels for gRNAs were between 0.5%-5%.</p> <p>- WT Cas9 had higher levels of indels (&gt;70%) than Cas9-BE</p> |      |
| 2021 | <p><i>In vitro</i>: HEK293T</p> <p><i>In vivo</i>: C57BL/6 mice;</p> | X, C, preS1 and preS2 ORFs | <p>Lipid Nanoparticle (Lipofectamine 2000)</p> <p>Cationic Polymer (Neofect)</p> <p>Adeno-Associated Virus Vector (AAV8)</p> <p>Lentivirus vector</p> | <p>1) <i>In vitro</i> effects:</p> <ul style="list-style-type: none"> <li>- All gRNAs of the reconstructed CRISPR/SaCas9 systems reduced average HBsAg and HBeAg levels by 25-85%.</li> <li>- T2, T3, T6, and Tmix reduced HBsAg and HBeAg levels by more than half</li> <li>- All gRNAs dramatically suppressed HBV replication and reduced the amount of rcccDNA.</li> <li>- HBV RNA transcripts were stably reduced by T2, T3, and T6.</li> </ul> <p>2) <i>In vivo</i> effects:</p> <ul style="list-style-type: none"> <li>- HBV core protein expression in mouse liver and serum HBsAg levels were significantly inhibited after AAV8-delivered CRISPR/SaCas9 treatment. Significant inhibition of HBeAg observed with AAV8-T2.</li> <li>- HBV DNA in the serum and HBV RNA in the liver were significantly reduced after T2, T6, or Tmix treatment.</li> </ul> | <p>- AAV8 showed clear liver tropism effects, reducing the possibility of off-target cleavage in other organs</p> | [19] |
| 2022 | <i>In vitro</i> : HepG2-2.15                                         | ORF X                      | Lipid Nanoparticle (Lipofectamine 2000)                                                                                                               | <p>1) Notable reductions in HBsAg and HBV cccDNA.</p> <p>2) Suppressed tumorigenic properties like cell proliferation, migration, and invasion in HepG2.2.15 cells.</p> <p>3) Altered key genes associated with EMT and cancer stemness.</p> <p>4) In 3D models, reduced HBV replication and tumor spheroid formation after HBx knockdown.</p>                                                                                                                                                                                                                                                                                                                                                                                                                                                                                                                      | <p>- Minimum off-target mismatches</p> <p>- Toxicity not reported</p>                                             | [20] |

## References

1. Zimmerman, K.A.; Fischer, K.P.; Joyce, M.A.; Tyrrell, D.L.J. Zinc Finger Proteins Designed to Specifically Target Duck Hepatitis B Virus Covalently Closed Circular DNA Inhibit Viral Transcription in Tissue Culture. *J. Virol.* **2008**, *82*, 8013–8021.
2. Cradick, T.J.; Keck, K.; Bradshaw, S.; Jamieson, A.C.; McCaffrey, A.P. Zinc-Finger Nucleases as a Novel Therapeutic Strategy for Targeting Hepatitis B Virus DNAs. *Mol. Ther.* **2010**, *18*, 947–954.
3. Mao, R.; Nie, H.; Cai, D.; Zhang, J.; Liu, H.; Yan, R.; Cuconati, A.; Block, T.M.; Guo, J.-T.; Guo, H. Inhibition of Hepatitis B Virus Replication by the Host Zinc Finger Antiviral Protein. *PLoS Pathog.* **2013**, *9*, e1003494.
4. Weber, N.D.; Stone, D.; Sedlak, R.H.; De Silva Felixge, H.S.; Roychoudhury, P.; Schiffer, J.T.; Aubert, M.; Jerome, K.R. AAV-Mediated Delivery of Zinc Finger Nucleases Targeting Hepatitis B Virus Inhibits Active Replication. *PLoS One* **2014**, *9*, e97579.
5. Chen, E.-Q.; Dai, J.; Bai, L.; Tang, H. The Efficacy of Zinc Finger Antiviral Protein against Hepatitis B Virus Transcription and Replication in Transgenic Mouse Model. *Virol. J.* **2015**, *12*, 25.
6. Luo, W.; Wang, J.; Xu, D.; Bai, H.; Zhang, Y.; Zhang, Y.; Li, X. Engineered Zinc-Finger Transcription Factors Inhibit the Replication and Transcription of HBV in Vitro and in Vivo. *Int. J. Mol. Med.* **2018**, *41*, 2169–2176.
7. Li, M.M.H.; Aguilar, E.G.; Michailidis, E.; Pabon, J.; Park, P.; Wu, X.; de Jong, Y.P.; Schneider, W.M.; Molina, H.; Rice, C.M.; et al. Characterization of Novel Splice Variants of Zinc Finger Antiviral Protein (ZAP). *J. Virol.* **2019**, *93*, doi:10.1128/JVI.00715-19.
8. Bloom, K.; Ely, A.; Mussolino, C.; Cathomen, T.; Arbuthnot, P. Inactivation of Hepatitis B Virus Replication in Cultured Cells and in Vivo with Engineered Transcription Activator-like Effector Nucleases. *Mol. Ther.* **2013**, *21*, 1889–1897.
9. Chen, J.; Zhang, W.; Lin, J.; Wang, F.; Wu, M.; Chen, C.; Zheng, Y.; Peng, X.; Li, J.; Yuan, Z. An Efficient Antiviral Strategy for Targeting Hepatitis B Virus Genome Using Transcription Activator-like Effector Nucleases. *Mol. Ther.* **2014**, *22*, 303–311.
10. Dreyer, T.; Nicholson, S.; Ely, A.; Arbuthnot, P.; Bloom, K. Improved Antiviral Efficacy Using TALEN-Mediated Homology Directed Recombination to Introduce Artificial Primary MiRNAs into DNA of Hepatitis B Virus. *Biochem. Biophys. Res. Commun.* **2016**, *478*, 1563–1568.
11. Smith, T.; Singh, P.; Chmielewski, K.O.; Bloom, K.; Cathomen, T.; Arbuthnot, P.; Ely, A. Improved Specificity and Safety of Anti-Hepatitis B Virus TALENs Using Obligate Heterodimeric FokI Nuclease Domains. *Viruses* **2021**, *13*, 1344.
12. Lin, S.-R.; Yang, H.-C.; Kuo, Y.-T.; Liu, C.-J.; Yang, T.-Y.; Sung, K.-C.; Lin, Y.-Y.; Wang, H.-Y.; Wang, C.-C.; Shen, Y.-C.; et al. The CRISPR/Cas9 System Facilitates Clearance of the Intrahepatic HBV Templates in Vivo. *Mol. Ther. Nucleic Acids* **2014**, *3*, e186.
13. Karimova, M.; Beschorner, N.; Dammermann, W.; Chemnitz, J.; Indenbirken, D.; Bockmann, J.-H.; Grundhoff, A.; Lüth, S.; Buchholz, F.; Wiesch, J.S.Z.; et al. CRISPR/Cas9 Nickase-Mediated Disruption of Hepatitis B Virus Open Reading Frame S and X. *Sci. Rep.* **2015**, *5*, doi:10.1038/srep13734.
14. Ramanan, V.; Shlomai, A.; Cox, D.B.T.; Schwartz, R.E.; Michailidis, E.; Bhatta, A.; Scott, D.A.; Zhang, F.; Rice, C.M.; Bhatia, S.N. CRISPR/Cas9 Cleavage of Viral DNA Efficiently Suppresses Hepatitis B Virus. *Sci. Rep.* **2015**, *5*, 1–9.
15. Zhu, W.; Xie, K.; Xu, Y.; Wang, L.; Chen, K.; Zhang, L.; Fang, J. CRISPR/Cas9 Produces Anti-Hepatitis B Virus Effect in Hepatoma Cells and Transgenic Mouse. *Virus Res.* **2016**, *217*, 125–132.
16. Li, H.; Sheng, C.; Wang, S.; Yang, L.; Liang, Y.; Huang, Y.; Liu, H.; Li, P.; Yang, C.; Yang, X.; et al. Removal of Integrated Hepatitis B Virus DNA Using CRISPR-Cas9. *Front. Cell. Infect. Microbiol.* **2017**, *7*, doi:10.3389/fcimb.2017.00091.
17. Stone, D.; Long, K.R.; Loprieno, M.A.; De Silva Felixge, H.S.; Kenkel, E.J.; Liley, R.M.; Rapp, S.; Roychoudhury, P.; Nguyen, T.; Stensland, L.; et al. CRISPR-Cas9 Gene Editing of Hepatitis B Virus in Chronically Infected Humanized Mice. *Mol. Ther. Methods Clin. Dev.* **2021**, *20*, 258–275.



18. Yang, Y.-C.; Chen, Y.-H.; Kao, J.-H.; Ching, C.; Liu, I.-J.; Wang, C.-C.; Tsai, C.-H.; Wu, F.-Y.; Liu, C.-J.; Chen, P.-J.; et al. Permanent Inactivation of HBV Genomes by CRISPR/Cas9-Mediated Non-Cleavage Base Editing. *Mol. Ther. Nucleic Acids* **2020**, *20*, 480–490.
19. Yan, K.; Feng, J.; Liu, X.; Wang, H.; Li, Q.; Li, J.; Xu, T.; Sajid, M.; Ullah, H.; Zhou, L.; et al. Inhibition of Hepatitis B Virus by AAV8-Derived CRISPR/SaCas9 Expressed from Liver-Specific Promoters. *Front. Microbiol.* **2021**, *12*, doi:10.3389/fmicb.2021.665184.
20. Rawal, P.; Tripathi, D.M.; Hemati, H.; Kumar, J.; Sarin, S.K.; Nain, V.; Kaur, S. Targeted HBx Gene Editing by CRISPR/Cas9 System Effectively Reduces Epithelial to Mesenchymal Transition and HBV Replication in Hepatoma Cells. *Research Square* 2022.
